# Supplementary material
Source: PubMed Central journal article supplement (PMC2999473)

1 **Legend for Figure 1**

2

3 Fig. 1. COCs cultured without exogenous E2 were not competent to undergo cumulus expansion or full  
4 expression of the cumulus expansion-related transcripts even in the presence of freshly isolated oocytes.

5 (A) COCs cultured without E2 were co-cultured with freshly isolated fully-grown oocytes and EGF, and  
6 the degree of cumulus expansion (B) and expression levels of the cumulus expansion-related transcripts

7 (C) were assessed. Bar, 200  $\mu$ m.

8

9

# Figure 1

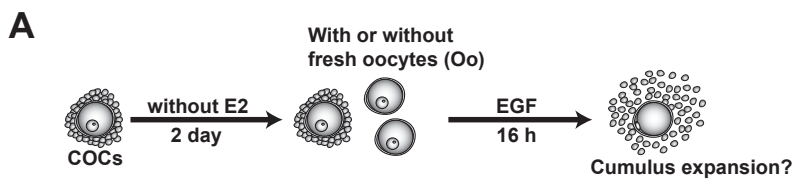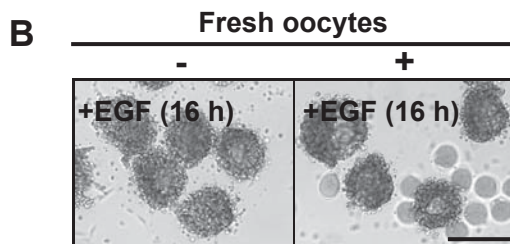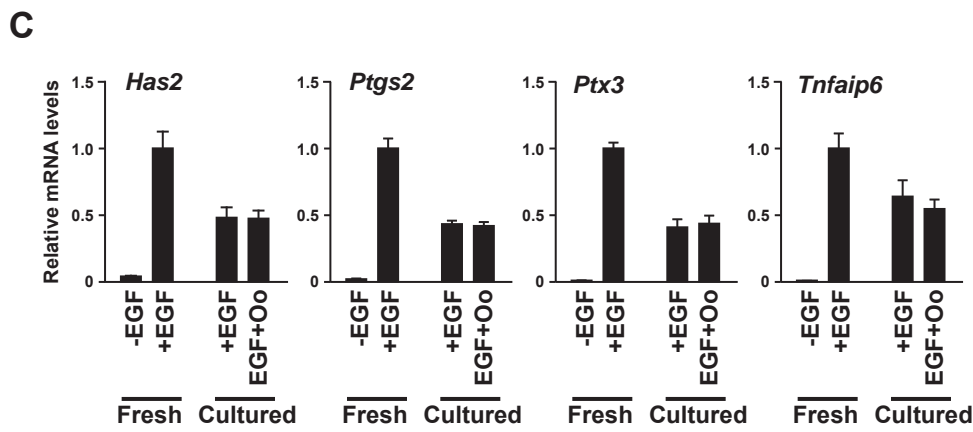

Supplement: me.2010-0260_1.pdf [file me.2010-0260_1.pdf]
